# Supplementary material
Source: publisher site journal article supplement (https://www.dovepress.com/article/254720)

## **Figure legends for the supplementary figures:**

### **Supplementary Figure 1**

As in Figure 5 d, intracellular GSH level of MGM- and IC-treated HHFKs was measured using an inverted fluorescence microscope. The total cell fluorescence of up to 100 cells per treatment was determined using the software, ImageJ, and total cell fluorescence was plotted against the percentage of cells.

### **Supplementary Figure 2**

a) Full gel images of Fig. 3c b) and Fig. 3d.

### **Supplementary Figure 3**

Full gel image of Fig. 4c.

### **Supplementary Figure 4**

a) Full gel images of Fig. 5c b) and Fig. 5e.

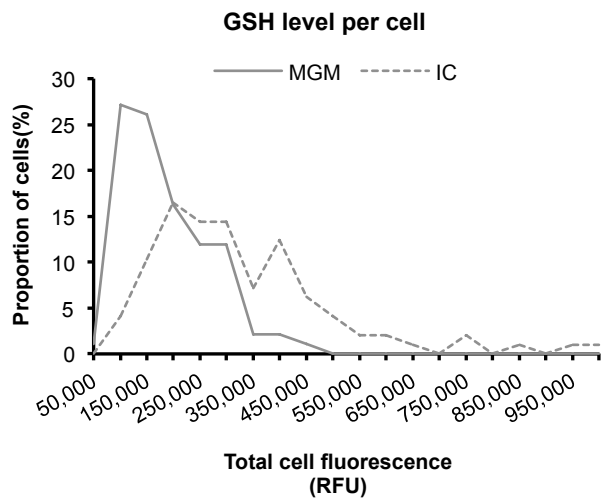

a)

MGM IC

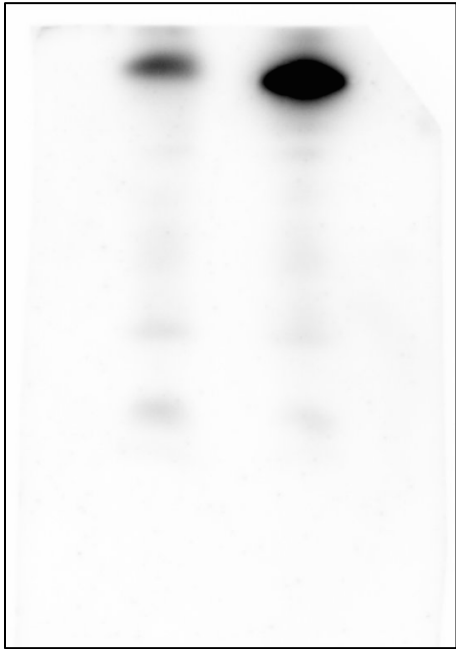

CDK1

b)

MGM IC

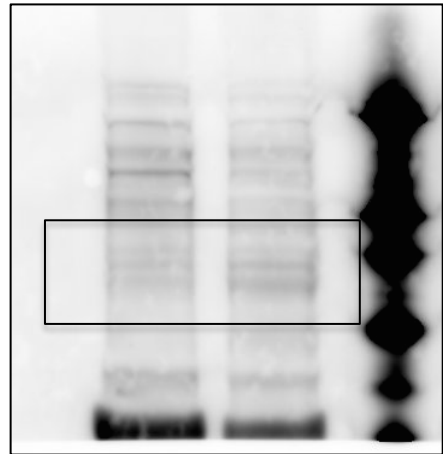

HJURP

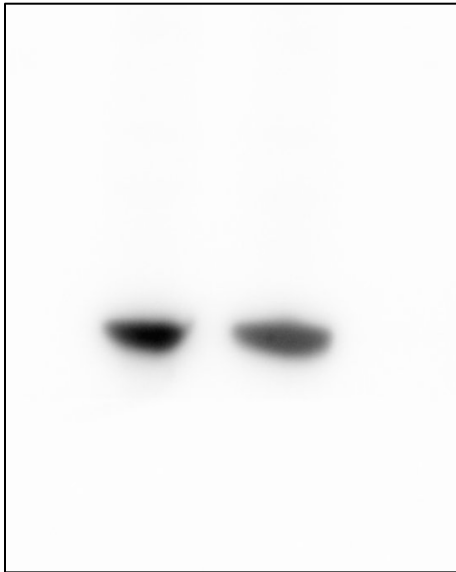

actin

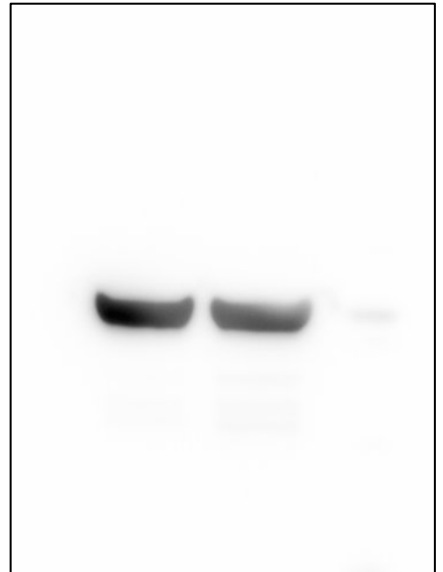

actin

MGM

IC

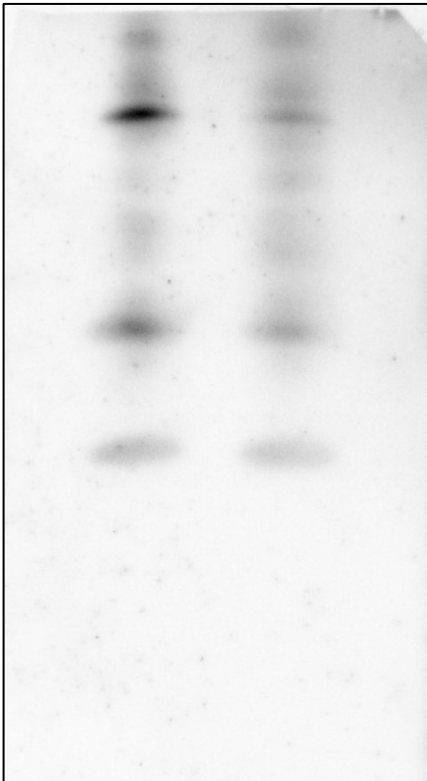

CHAC1

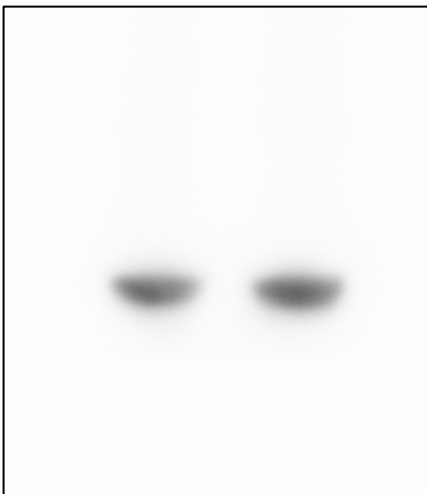

actin

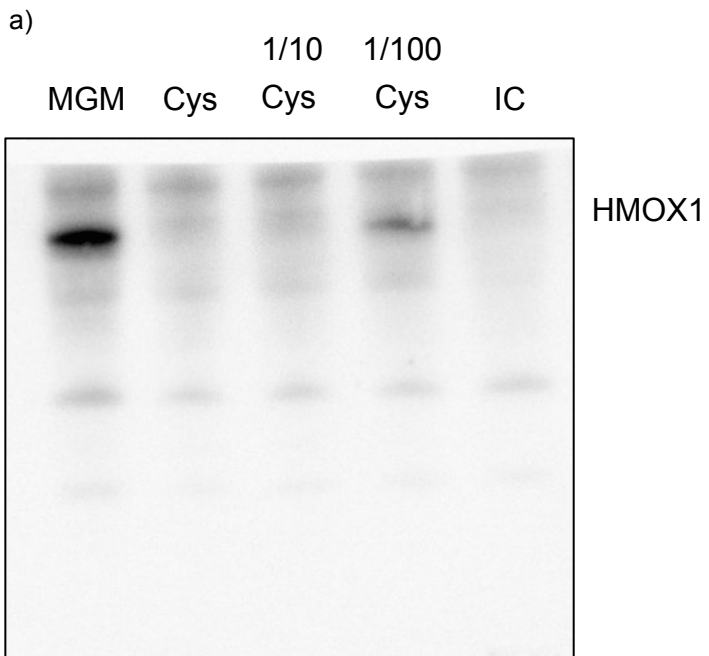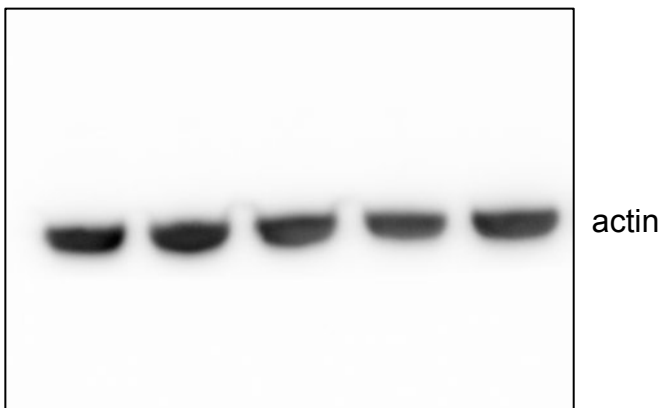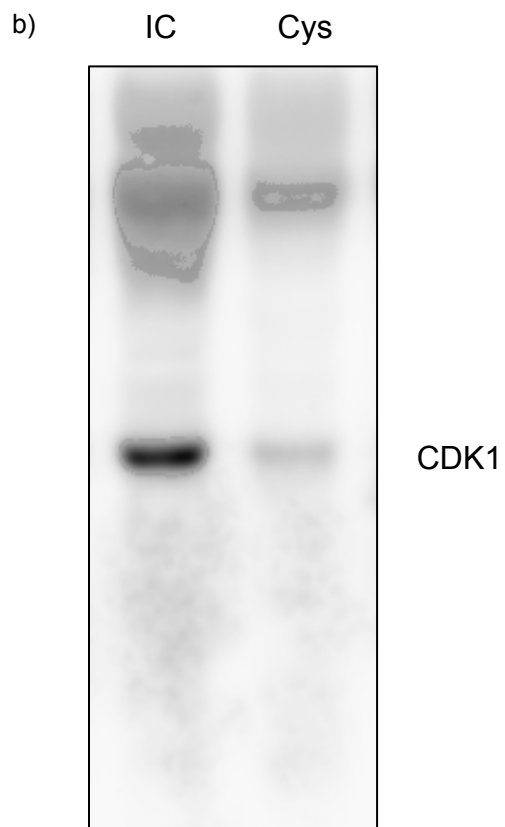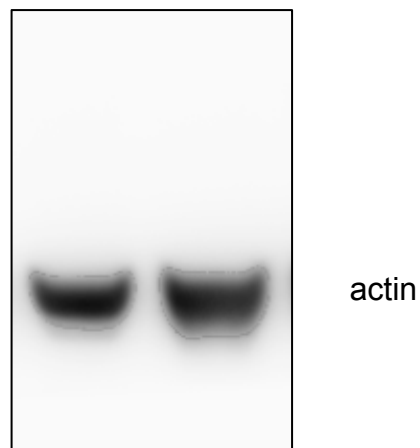

Supplement: Supplementary file 1 [file get_supplementary_file.php]
